# Supplementary material for: New Species of Didymellaceae within Aquatic Plants from Southwestern China
Source: MDPI journal article supplement (doi:10.3390/jof9070761), 2023-07-19
Supplement: s1 [file s1]

**Table S1.** GenBank accession numbers of taxa used in phylogenetic analyses

| Species                            | Strain number  | GenBank accession numbers |          |             |             |
|------------------------------------|----------------|---------------------------|----------|-------------|-------------|
|                                    |                | ITS                       | LSU      | <i>rpb2</i> | <i>tub2</i> |
| <i>Allophoma alba</i>              | CBS 120422     | MN973469                  | MN943671 | MT018044    | MT005568    |
| <i>Allophoma anatii</i>            | CBS 124673     | MN973472                  | MN943674 | MT018048    | MT005571    |
| <i>Allophoma cylindrispora</i>     | CBS 142453     | LT592920                  | LN907376 | LT593058    | LT592989    |
| <i>Allophoma hayatii</i>           | YMF1.05027     | MH257423                  | MH257424 | OQ737920    | MH400428    |
| <i>Allophoma hayatii</i>           | CBS 142859     | KY684812                  | KY684814 | MF095108    | KY684816    |
| <i>Allophoma hayatii</i>           | CBS 142860     | KY684813                  | KY684815 | MF095109    | KY684817    |
| <i>Allophoma labilis</i>           | CBS 479.93     | GU237868                  | GU238092 | MN983277    | GU237620    |
| <i>Allophoma labilis</i>           | CBS 540.77     | MN972686                  | -        | MN983278    | MN983703    |
| <i>Allophoma minor</i>             | CBS 325.82     | GU237831                  | GU238107 | KT389553    | GU237632    |
| <i>Allophoma nicaraguensis</i>     | CBS 506.91     | GU237876                  | GU238058 | KT389551    | GU237596    |
| <i>Allophoma oligotrophica</i>     | CGMCC 3.18114  | KY742040                  | KY742194 | KY742128    | KY742282    |
| <i>Allophoma piperis</i>           | CBS 268.93     | GU237816                  | GU238129 | KT389554    | GU237644    |
| <i>Allophoma siamensis</i>         | MFLUCC 17-2422 | MK347742                  | MK347959 | MK434912    | MK412867    |
| <i>Allophoma tropica</i>           | CBS 436.75     | GU237864                  | GU238149 | KT389556    | GU237663    |
| <i>Allophoma zantedeschiae</i>     | CBS 229.32     | KT389473                  | KT389690 | KT389558    | KT389767    |
| <i>Ascochyta fabae</i>             | CBS 524.77     | GU237880                  | GU237963 | MT018241    | GU237526    |
| <i>Ascochyta lentis</i>            | CBS 370.84     | KT389474                  | KT389691 | MT018246    | KT389768    |
| <i>Ascochyta pisi</i>              | CBS 122785     | GU237763                  | GU237969 | MT018244    | GU237532    |
| <i>Ascochyta syringae</i>          | CBS 545.72     | KT389483                  | KT389700 | MT018245    | KT389777    |
| <i>Ascochyta viciae</i>            | CBS 451.68     | KT389484                  | KT389701 | KT389562    | KT389778    |
| <i>Ascochyta viciae-pannonicae</i> | CBS 254.92     | KT389485                  | KT389702 | MT018250    | KT389779    |
| <i>Ascochyta viciae-villosae</i>   | CBS 255.92     | MN973584                  | MN943790 | MT018249    | MT005690    |
| <i>Boeremia coffeae</i>            | CBS 109183 (R) | GU237748                  | GU237943 | KT389566    | GU237505    |

|                                                     |                   |                 |                 |                 |                 |
|-----------------------------------------------------|-------------------|-----------------|-----------------|-----------------|-----------------|
| <i>Boeremia crinicola</i>                           | CBS 109.79 (R)    | GU237737        | GU237927        | KT389563        | GU237489        |
| <i>Boeremia diversispora</i>                        | CBS 102.80 (R)    | GU237725        | GU237930        | KT389565        | GU237492        |
| <i>Boeremia exigua</i>                              | CBS 107.21        | KT389491        | KT389708        | -               | KT389785        |
| <i>Boeremia exigua</i>                              | CBS 119.38        | KT389490        | KT389707        | KT389583        | KT389784        |
| <i>Boeremia exigua</i>                              | CBS 101197        | MN972715        | GU237931        | MN983312        | MN983731        |
| <i>Boeremia exigua</i> var. <i>exigua</i>           | CBS 101150        | GU237715        | EU754182        | KT389568        | GU237495        |
| <i>Boeremia exigua</i> var. <i>forsythiae</i>       | CBS 101213        | GU237723        | GU237932        | KT389571        | GU237494        |
| <i>Boeremia exigua</i> var. <i>gilvoscens</i>       | CBS 761.70        | MH859929        | MH871730        | -               | MN983778        |
| <i>Boeremia exigua</i> var. <i>gilvoscens</i>       | PD 98/213         | KY484653        | -               | -               | KY484752        |
| <b><i>Boeremia exigua</i> var. <i>kasensis</i></b>  | <b>YMF1.05091</b> | <b>MH233939</b> | <b>MH257435</b> | <b>MH311790</b> | <b>MH422975</b> |
| <b><i>Boeremia exigua</i> var. <i>kasensis</i></b>  | <b>YMF1.05031</b> | <b>MH233941</b> | <b>MH257430</b> | <b>MH311787</b> | <b>MH400434</b> |
| <b><i>Boeremia exigua</i> var. <i>kasensis</i></b>  | <b>YMF1.05057</b> | <b>MH233944</b> | <b>MH257426</b> | <b>MH311784</b> | <b>MH400430</b> |
| <b><i>Boeremia exigua</i> var. <i>kasensis</i></b>  | <b>YMF1.05205</b> | <b>MH233946</b> | <b>MH257439</b> | <b>MH311793</b> | <b>MH422979</b> |
| <b><i>Boeremia exigua</i> var. <i>kasensis</i></b>  | <b>YMF1.05043</b> | <b>MH233947</b> | <b>MH257440</b> | <b>MH311794</b> | <b>MH422980</b> |
| <b><i>Boeremia exigua</i> var. <i>kasensis</i></b>  | <b>YMF1.05094</b> | <b>MH233943</b> | <b>MH257437</b> | <b>MH311791</b> | <b>MH422977</b> |
| <b><i>Boeremia exigua</i> var. <i>kasensis</i></b>  | <b>KS18</b>       | <b>MH233945</b> | <b>MH257428</b> | <b>-</b>        | <b>MH400432</b> |
| <i>Boeremia exigua</i> var. <i>populi</i>           | CBS 113.36        | MN972774        | MH867235        | MN983373        | MN983790        |
| <i>Boeremia exigua</i> var. <i>populi</i>           | CBS 120111        | MN972773        | -               | MN983372        | MN983789        |
| <i>Boeremia exigua</i> var. <i>pseudolilacis</i>    | CBS 118803        | MN972787        | -               | MN983388        | MN983804        |
| <i>Boeremia exigua</i> var. <i>pseudolilacis</i>    | CBS 140180        | MN972786        | -               | MN983387        | MN983803        |
| <i>Boeremia exigua</i> var. <i>viburni</i>          | YMF1.05077        | MH233934        | MH257425        | MH311783        | MH400429        |
| <i>Boeremia exigua</i> var. <i>viburni</i>          | YMF1.05216        | MH233958        | MH257448        | MH311800        | MH422988        |
| <i>Boeremia exigua</i> var. <i>viburni</i>          | YMF1.05009        | MH233957        | MH257449        | MH311801        | MH422989        |
| <b><i>Boeremia exigua</i> var. <i>vulgartis</i></b> | <b>YMF1.05039</b> | <b>MH233959</b> | <b>MH257450</b> | <b>MH311802</b> | <b>MH422990</b> |
| <b><i>Boeremia exigua</i> var. <i>vulgartis</i></b> | <b>YMF1.05042</b> | <b>MH233960</b> | <b>MH257451</b> | <b>MH311803</b> | <b>MH422991</b> |
| <b><i>Boeremia exigua</i> var. <i>vulgartis</i></b> | <b>YMF1.05206</b> | <b>MH233951</b> | <b>MH257442</b> | <b>-</b>        | <b>MH422982</b> |

|                                                     |                |                 |                 |                 |                 |
|-----------------------------------------------------|----------------|-----------------|-----------------|-----------------|-----------------|
| <b><i>Boeremia exigua</i> var. <i>vulgartis</i></b> | <b>YL23</b>    | <b>MH233961</b> | <b>MH257452</b> | <b>MH311804</b> | <b>MH422992</b> |
| <i>Boeremia exigua</i> var. <i>vibumi</i>           | CBS 100354     | GU237711        | GU237944        | KT389577        | GU237506        |
| <i>Boeremia exigua</i> var. <i>viburni</i>          | CBS 101211     | GU237722        | GU237945        | MN983334        | GU237507        |
| <i>Boeremia foveata</i>                             | CBS 200.37*    | MW810263        | MW715034        | MW735651        | MW815124        |
| <i>Boeremia galiicola</i>                           | MFLUCC15-0771  | KX698037        | KX698026        | -               | KX698030        |
| <i>Boeremia hedericola</i>                          | CBS 367.91     | GU237842        | GU237949        | KT389579        | GU237511        |
| <i>Boeremia heteromorpha</i>                        | CBS 443.94*    | GU237866        | GU237935        | KT389573        | GU237497        |
| <i>Boeremia lilacis</i>                             | CBS 569.79 (R) | GU237892        | GU237936        | -               | GU237498        |
| <i>Boeremia linicola</i>                            | YMF1.05017     | MH233950        | MH257441        | MH311795        | MH422981        |
| <i>Boeremia linicola</i>                            | CBS 116.76 (R) | GU237754        | GU237938        | KT389574        | GU237500        |
| <i>Boeremia linicola</i>                            | CBS 114.28     | MH854944        | MH866435        | MN983365        | GU237499        |
| <i>Boeremia lycopersici</i>                         | CBS 161.47*    | MN972797        | NG 077375       | MW735649        | MN983814        |
| <i>Boeremia noackiana</i>                           | CBS 100353 (R) | GU237710        | GU237952        | -               | GU237514        |
| <i>Boeremia opuli</i>                               | CGMCC38354     | KY742045        | KY742199        | KY742133        | KY742287        |
| <i>Boeremia opuli</i>                               | LC8118         | KY742046        | KY742200        | KY742134        | KY742288        |
| <i>Boeremia populi</i>                              | CBS 100167*    | GU237707        | GU237939        | -               | GU237501        |
| <i>Boeremia pseudolilacis</i>                       | CBS 423.67     | KT389487        | KT389704        | KT389576        | KT389781        |
| <i>Boeremia pseudolilacis</i>                       | CBS 462.67     | KT389488        | KT389705        | MN983420        | KT389782        |
| <i>Boeremia sambuci-nigrae</i>                      | CBS 629.68*    | GU237897        | GU237955        | -               | GU237517        |
| <i>Boeremia strasseri</i>                           | CBS 126.93 (R) | GU237773        | GU237956        | KT389584        | GU237518        |
| <i>Boeremia telephii</i>                            | CBS 109175 (R) | GU237741        | GU237958        | KT389585        | GU237520        |
| <i>Boeremia trachelospermi</i>                      | CGMCC 38222    | KY064028        | KY064032        | KY064033        | KY064051        |
| <i>Briansuttonomyces eucalypti</i>                  | CBS 114879     | KU728479        | KU728519        | MT018239        | KU728595        |
| <i>Briansuttonomyces eucalypti</i>                  | CBS 114887     | KU728480        | KU728520        | MT018240        | KU728596        |
| <i>Calophoma aquilegiicola</i>                      | CBS 107.96     | GU237735        | GU238041        | KT389586        | GU237581        |
| <i>Calophoma clematidis-rectae</i>                  | CBS 507.63     | FJ515606        | FJ515647        | KT389589        | FJ515624        |

|                                        |                   |                 |                 |                 |                 |
|----------------------------------------|-------------------|-----------------|-----------------|-----------------|-----------------|
| <i>Calophoma glaucii</i>               | CBS 114.96        | FJ515609        | FJ515649        | MT018232        | FJ515627        |
| <i>Calophoma rosae</i>                 | CGMCC 3.18347     | KY742049        | KY742203        | KY742135        | KY742291        |
| <i>Cumuliphoma indica</i>              | CBS 991.95        | MN973546        | MN943753        | MT018184        | MT005649        |
| <i>Cumuliphoma indica</i>              | CBS 123396        | FJ427046        | MN973198        | MN983433        | MN983839        |
| <b><i>Cumuliphoma lijiangensis</i></b> | <b>YMF1.05096</b> | <b>MH257400</b> | <b>MH257485</b> | <b>MH311838</b> | <b>MH423002</b> |
| <i>Cumuliphoma omnivirens</i>          | CBS 341.86        | FJ427042        | LT623214        | LT623260        | FJ427152        |
| <i>Cumuliphoma pneumoniae</i>          | CBS 142454        | LT592925        | LN907392        | LT593063        | LT592994        |
| <i>Didymella acetosellae</i>           | CBS 631.76 ET     | MN973542        | MN943749        | MT018176        | MT005645        |
| <i>Didymella aloecicola</i>            | CBS 562.88 T      | MN973535        | MN943742        | MT018164        | MT005638        |
| <i>Didymella americana</i>             | CBS 185.85        | FJ426972        | GU237990        | KT389594        | FJ427088        |
| <i>Didymella americana</i>             | CBS 568.97        | FJ426974        | GU237991        | MN983437        | FJ427090        |
| <i>Didymella anserina</i>              | CBS 360.84        | GU237839        | GU237993        | KT389596        | GU237551        |
| <i>Didymella aquatica</i>              | CGMCC 3.18349 T   | KY742055        | KY742209        | KY742140        | KY742297        |
| <i>Didymella arachidicola</i>          | CBS 333.75 T      | GU237833        | GU237996        | KT389598        | GU237554        |
| <i>Didymella bellidis</i>              | CBS 714.85        | GU237904        | GU238046        | KP330417        | GU237586        |
| <i>Didymella brunneospora</i>          | CBS 115.58 T      | KT389505        | KT389723        | KT389625        | KT389802        |
| <i>Didymella chlamydospora</i>         | CGMCC 3.20072     | MT229695        | MT229672        | MT239092        | MT249263        |
| <i>Didymella coffeae-arabicae</i>      | CBS 123380 T      | FJ426993        | GU238005        | KT389603        | FJ427104        |
| <i>Didymella combreti</i>              | CBS 137982 T      | KJ869134        | KJ869191        | MT018139        | MT005626        |
| <i>Didymella curtisii</i>              | CBS 251.92        | FJ427038        | GU238013        | MT018131        | FJ427148        |
| <i>Didymella dactylidis</i>            | CBS 124513 T      | GU237766        | GU238061        | MT018173        | GU237599        |
| <i>Didymella degraaffiae</i>           | YMF1.05212        | MH257408        | MH257493        | MH311843        | OQ737922        |
| <i>Didymella degraaffiae</i>           | CBS 144956 T      | MN823444        | MN823295        | MN824470        | MN824618        |
| <i>Didymella dimorpha</i>              | CBS 346.82 T      | GU237835        | GU238068        | MT018158        | GU237606        |
| <b><i>Didymella erhaiensis</i></b>     | <b>YMF1.05023</b> | <b>MH257369</b> | <b>MH257457</b> | <b>MH311809</b> | <b>MH422997</b> |
| <b><i>Didymella erhaiensis</i></b>     | <b>YMF1.05024</b> | <b>MH257366</b> | <b>MH257454</b> | <b>MH311806</b> | <b>MH422994</b> |

|                                  |                 |          |          |          |          |
|----------------------------------|-----------------|----------|----------|----------|----------|
| <i>Didymella erhaiensis</i>      | YMF1.05084      | MH257368 | MH257456 | MH311808 | MH422996 |
| <i>Didymella erhaiensis</i>      | YMF1.05021      | MH257367 | MH257455 | MH311807 | MH422995 |
| <i>Didymella eucalyptica</i>     | CBS 377.91      | GU237846 | GU238007 | KT389605 | GU237562 |
| <i>Didymella exigua</i>          | CBS 183.55 T    | GU237794 | EU754155 | EU874850 | GU237525 |
| <i>Didymella gardeniae</i>       | CBS 626.68 I T  | FJ427003 | GQ387595 | KT389606 | FJ427114 |
| <i>Didymella gei</i>             | YMF1.05051      | MH257403 | MH257488 | -        | OQ737923 |
| <i>Didymella gei</i>             | CGMCC 3.20068   | MT229698 | MT229675 | MT239095 | MT249266 |
| <i>Didymella glomerata</i>       | DF34            | MH257370 | -        | MH311810 | -        |
| <i>Didymella glomerata</i>       | JH24            | MH257371 | -        | MH311811 | MH422998 |
| <i>Didymella glomerata</i>       | CBS 528.66      | FJ427013 | EU754184 | GU371781 | FJ427124 |
| <i>Didymella gongkasis</i>       | YMF1.05095      | MH257372 | MH257458 | MH311812 | MH422999 |
| <i>Didymella gongkasis</i>       | YMF1.05029      | MH257373 | MH257459 | MH311813 | MH423000 |
| <i>Didymella guttulata</i>       | CBS 127976 T    | MN973524 | MN943730 | MT018138 | MT005625 |
| <i>Didymella heteroderae</i>     | CBS 109.92 T    | FJ426983 | GU238002 | KT389601 | FJ427098 |
| <i>Didymella hippuris</i>        | YMF1.05089      | MH257388 | MH257473 | MH311827 | MH423015 |
| <i>Didymella hippuris</i>        | YMF1.05204      | MH257397 | MH257482 | MH311835 | -        |
| <i>Didymella hippuris</i>        | YMF1.05037      | MH257381 | MH257467 | MH311821 | -        |
| <i>Didymella hippuris</i>        | YMF1.05210      | MH257374 | MH257460 | MH311814 | -        |
| <i>Didymella ilicicola</i>       | CGMCC 3.18355 T | KY742065 | KY742219 | KY742150 | KY742307 |
| <i>Didymella indica</i>          | CBS 653.77 T    | MN973534 | MN943741 | MT018159 | MT005637 |
| <i>Didymella infuscatisspora</i> | CGMCC 3.18356 T | KY742067 | KY742221 | KY742152 | KY742309 |
| <i>Didymella myriophyllana</i>   | YMF1.05035      | MH257399 | MH257484 | MH311837 | MH423001 |
| <i>Didymella keratinophila</i>   | CBS 143032 T    | LT592901 | LN907343 | LT593039 | LT592970 |
| <i>Didymella lethalis</i>        | CBS 103.25      | GU237729 | GU238010 | KT389607 | GU237564 |
| <i>Didymella ligulariae</i>      | CGMCC 3.20070   | MT229699 | MT229676 | MT239096 | MT249267 |
| <i>Didymella longicolla</i>      | CBS 124514 T    | GU237767 | GU238095 | MT018161 | GU237622 |

|                                       |                   |                 |                 |                 |                 |
|---------------------------------------|-------------------|-----------------|-----------------|-----------------|-----------------|
| <i>Didymella macrophylla</i>          | CGMCC 3.18357 T   | KY742070        | KY742224        | KY742154        | KY742312        |
| <i>Didymella macrostoma</i>           | CBS 223.69        | GU237801        | GU238096        | KT389608        | GU237623        |
| <i>Didymella maydis</i>               | CBS 588.69 T      | FJ427086        | EU754192        | GU371782        | FJ427190        |
| <i>Didymella maydis</i>               | CBS 247.60        | MN973269        | -               | -               | MN983897        |
| <i>Didymella microchlamydospora</i>   | CBS 105.95 T      | FJ427028        | GU238104        | KP330424        | FJ427138        |
| <i>Didymella mitis</i>                | CBS 443.72 T      | MN973523        | MN943729        | MT018137        | MT005624        |
| <b><i>Didymella myriophyllana</i></b> | <b>GZ58</b>       | <b>MH257402</b> | <b>MH257487</b> | <b>-</b>        | <b>MH400427</b> |
| <b><i>Didymella myriophyllana</i></b> | <b>YMF1.05100</b> | <b>MH257401</b> | <b>MH257486</b> | <b>MH311839</b> | <b>MH423003</b> |
| <i>Didymella negriana</i>             | CBS 358.71        | GU237838        | GU238116        | KT389610        | GU237635        |
| <i>Didymella nigricans</i>            | CBS 444.81 T      | GU237867        | GU238000        | MT018146        | GU237558        |
| <i>Didymella ocimicola</i>            | CGMCC 3.18358 T   | KY742078        | KY742232        | MT018181        | KY742320        |
| <i>Didymella pedeiaae</i>             | CBS 124517 T      | GU237770        | GU238127        | KT389612        | GU237642        |
| <i>Didymella pinodella</i>            | CBS 531.66        | FJ427052        | GU238017        | KT389613        | FJ427162        |
| <i>Didymella pinodes</i>              | CBS 525.77 ET     | GU237883        | GU238023        | KT389614        | GU237572        |
| <i>Didymella pomorum</i>              | CBS 539.66 T      | FJ427056        | GU238028        | KT389618        | FJ427166        |
| <i>Didymella pomorum</i>              | CBS 354.52        | MH857081        | MH868616        | KT389616        | KT389799        |
| <i>Didymella prolaticolla</i>         | CBS 126182 T      | MN973533        | MN943740        | MT018157        | MT005636        |
| <i>Didymella prosopidis</i>           | CBS 136414 T      | KF777180        | KF777232        | MT018149        | MT005631        |
| <i>Didymella protuberans</i>          | CBS 381.96N T     | GU237853        | GU238029        | KT389620        | GU237574        |
| <i>Didymella qilianensis</i>          | LC 13584          | MT229700        | MT229677        | MT239097        | MT249268        |
| <i>Didymella qilianensis</i>          | CGMCC 3.20071     | MT229701        | MT229678        | MT239098        | MT249269        |
| <i>Didymella rhei</i>                 | CBS 109177        | GU237743        | GU238139        | KP330428        | GU237653        |
| <i>Didymella rhei</i>                 | BRIP 5562         | KY742083        | KY742237        | KY742163        | KY742325        |
| <i>Didymella sancta</i>               | CBS 281.83 T      | FJ427063        | GU238030        | KT389623        | FJ427170        |
| <i>Didymella segeticola</i>           | CGMCC 3.17489 T   | KP330443        | KP330455        | KP330414        | KP330399        |
| <i>Didymella senecionicola</i>        | CBS 160.78        | GU237787        | GU238143        | MT018177        | GU237657        |

|                                      |                   |                 |                 |                 |                 |
|--------------------------------------|-------------------|-----------------|-----------------|-----------------|-----------------|
| <i>Didymella sinensis</i>            | YMF1.05207        | MH257407        | MH257492        | OQ737927        | MH423007        |
| <i>Didymella sinensis</i>            | YMF1.05008        | MH257405        | MH257490        | MH311842        | MH423005        |
| <i>Didymella sinensis</i>            | CGMCC 3.18348 T   | KY742085        | KY742239        | MT018127        | KY742327        |
| <i>Didymella sinensis</i>            | CGMCC 3.18113     | KX829033        | KX829041        | MT018126        | KX829057        |
| <i>Didymella subglobispora</i>       | CBS 364.91 T      | MN973531        | MN943737        | MT018153        | MT005634        |
| <i>Didymella subglomerata</i>        | CBS 110.92        | FJ427080        | GU238032        | KT389626        | FJ427186        |
| <i>Didymella subherbarum</i>         | CBS 250.92 T      | GU237809        | GU238145        | MT018162        | GU237659        |
| <i>Didymella subrosea</i>            | CBS 733.79 T      | MN973540        | MN943747        | MT018174        | MT005643        |
| <i>Didymella suiyangensis</i>        | CGMCC 3.18352 T   | KY742089        | KY742243        | KY742168        | KY742330        |
| <i>Didymella suiyangensis</i>        | LC 8144           | KY742090        | KY742244        | KY742169        | KY742332        |
| <i>Didymella uniseptata</i>          | CGMCC 3.20069     | MT229702        | MT229679        | MT239099        | MT249270        |
| <i>Didymella variabilis</i>          | CBS 254.79 T      | MN973544        | MN943751        | MT018182        | MT005647        |
| <i>Didysimulans italica</i>          | MFLUCC 15-0059    | KY496750        | KY496730        | KY514408        | -               |
| <i>Didysimulans mezzanensis</i>      | MFLUCC 15-0067    | KY496753        | KY496733        | KY514411        | -               |
| <b><i>Dimorphoma isotiana</i></b>    | <b>YMF1.05048</b> | <b>MH257422</b> | <b>MH257507</b> | <b>MH311852</b> | <b>MH423018</b> |
| <i>Dimorphoma saxea</i>              | CBS 419.92        | GU237860        | GU238141        | KP330429        | MT005727        |
| <i>Dimorphoma saxea</i>              | CBS 298.89        | GU237824        | GU238140        | MT018299        | GU237654        |
| <i>Ectodidymella nigrificans</i>     | CBS 100190        | GU237708        | GU237967        | MT018078        | GU237530        |
| <i>Ectodidymella nigrificans</i>     | PD 84/512         | GU237919        | GU237966        | MT018077        | GU237529        |
| <i>Ectophoma insulana</i>            | CBS 252.92        | MN973481        | MN943685        | MT018070        | MT005581        |
| <i>Ectophoma insulana</i>            | CBS 140548        | MN973482        | MN943686        | MT018071        | MT005582        |
| <i>Ectophoma multirostrata</i>       | YMF1.05209        | MH257416        | MH257501        | OQ737928        | MH423012        |
| <i>Ectophoma multirostrata</i>       | CBS 274.60        | FJ427031        | GU238111        | LT623265        | FJ427141        |
| <i>Ectophoma multirostrata</i>       | CBS 380.67        | FJ427032        | MN943683        | MT018068        | FJ427142        |
| <b><i>Ectophoma myriophyllum</i></b> | <b>YMF1.05050</b> | <b>MH257417</b> | <b>MH257502</b> | <b>MH311848</b> | <b>MH423013</b> |
| <b><i>Ectophoma myriophyllum</i></b> | <b>YMF1.05208</b> | <b>MH257418</b> | <b>MH257503</b> | <b>MH311849</b> | <b>MH423014</b> |

|                                  |                |          |          |          |          |
|----------------------------------|----------------|----------|----------|----------|----------|
| <i>Ectophoma pomii</i>           | CBS 267.92     | GU237814 | GU238128 | LT623263 | GU237643 |
| <i>Ectophoma pomii</i>           | CBS 121.93     | MN972933 | MN973320 | MN983570 | MN983948 |
| <i>Epicoccum camelliae</i>       | CGMCC 3.18343  | KY742091 | KY742245 | KY742170 | KY742333 |
| <i>Epicoccum catenisorum</i>     | CBS 181.80     | FJ427069 | -        | -        | FJ427175 |
| <i>Epicoccum cedri</i>           | MFLU:16-1358   | KY711170 | KY711172 | -        | KY711168 |
| <i>Epicoccum dendrobii</i>       | CGMCC 3.18359  | KY742093 | KY742247 | MT018084 | KY742335 |
| <i>Epicoccum huancayense</i>     | YMF1.05047     | MH257409 | MH257494 | MH311844 | MH423008 |
| <i>Epicoccum huancayense</i>     | CBS 105.80     | MH861244 | MH873016 | KT389630 | GU237615 |
| <i>Epicoccum huancayense</i>     | CBS 390.93     | GU237857 | GU238085 | MT018111 | GU237616 |
| <i>Epicoccum latusicollum</i>    | KS52           | MH257410 | MH257495 | MH311845 | MH423009 |
| <i>Epicoccum latusicollum</i>    | CGMCC 3.18346* | KY742101 | KY742255 | KY742174 | KY742343 |
| <i>Epicoccum latusicollum</i>    | LC 4859        | KY742102 | KY742256 | KY742175 | KY742344 |
| <i>Epicoccum longiostiolatum</i> | CBS 902.96     | MN973507 | MN943713 | MT018110 | MT005607 |
| <i>Epicoccum mackenziei</i>      | MFLUCC 16-0335 | KX698039 | KX698028 | KX698035 | KX698032 |
| <i>Epicoccum mezzettii</i>       | CBS 173.38     | MN973496 | MN943701 | MT018095 | MT005596 |
| <i>Epicoccum nigrum</i>          | CBS 173.73     | FJ426996 | GU237975 | KT389632 | FJ427107 |
| <i>Epicoccum oryzae</i>          | CBS 174.34     | MN973500 | MN943705 | MT018099 | MT005600 |
| <i>Epicoccum ovisporum</i>       | CBS 180.80     | FJ427068 | LT623212 | LT623252 | FJ427174 |
| <i>Epicoccum plurivorum</i>      | KS55           | MH257411 | MH257496 | OQ737929 | MH423010 |
| <i>Epicoccum plurivorum</i>      | CBS 558.81     | GU237888 | GU238132 | KT389634 | GU237647 |
| <i>Epicoccum plurivorum</i>      | CBS 284.93     | GU237822 | GU238131 | MN983591 | GU237646 |
| <i>Epicoccum poaeicola</i>       | MFLUCC 15-0448 | KX965727 | KX954396 | KX898365 | KY197980 |
| <i>Epicoccum poae</i>            | LC 8161        | KY742114 | KY742268 | KY742183 | KY742356 |
| <i>Epicoccum poae</i>            | CGMCC 3.18363  | KY742113 | KY742267 | KY742182 | KY742355 |
| <i>Epicoccum polychromum</i>     | CBS 141502     | MN973506 | MN943712 | MT018109 | MT005606 |
| <i>Epicoccum proteae</i>         | CBS 114179     | JQ044433 | JQ044452 | LT623251 | LT623230 |



|                                        |                 |           |           |          |          |
|----------------------------------------|-----------------|-----------|-----------|----------|----------|
| <i>Epicoccum proteae</i>               | CBS 113875      | MN973508  | MN943714  | MT018112 | MT005608 |
| <i>Epicoccum pruni</i>                 | MFLUCC 17-1059  | NR 165862 | NG 069437 | -        | -        |
| <i>Epicoccum purpurascens</i>          | CBS 124435      | MN973486  | MN943691  | MT018081 | MT005586 |
| <i>Epicoccum purpurascens</i>          | CBS 128906      | MN973488  | MN943693  | MT018083 | MT005588 |
| <i>Epicoccum sorghi</i>                | CBS 563.88      | MN973504  | MN943709  | MT018106 | MT005604 |
| <i>Epicoccum sorghinum</i>             | CBS 179.80      | FJ427067  | GU237978  | KT389635 | FJ427173 |
| <i>Epicoccum thailandicum</i>          | QC12            | OQ421503  | OQ421505  | OQ737930 | OQ737924 |
| <i>Epicoccum thailandicum</i>          | MFLUCC 16-0892  | KY703619  | KY703620  | -        | -        |
| <i>Epicoccum thailandicum</i>          | UTHSC: DI16-257 | LT592927  | LN907400  | LT593065 | LT592996 |
| <i>Epicoccum tobaicum</i>              | CBS 384.36      | MN973493  | MN943698  | MT018092 | MT005593 |
| <i>Epicoccum tritici</i>               | MFLUCC 16-0276  | KX926426  | KX954391  | -        | KY197979 |
| <i>Epicoccum variabile</i>             | CBS 119733      | MN973501  | MN943706  | MT018103 | MT005601 |
| <i>Epicoccum viticis</i>               | CGMCC 3.18344   | KY742118  | KY742272  | KY742186 | KY742360 |
| <i>Heterophoma nobilis</i>             | CBS 507.91      | GU237877  | GU238065  | KT389638 | GU237603 |
| <i>Heterophoma poolensis</i>           | CBS 116.93      | GU237755  | GU238134  | MT018055 | GU237649 |
| <i>Heterophoma sylvatica</i>           | CBS 874.97      | GU237907  | GU238148  | MT018052 | GU237662 |
| <i>Heterophoma verbascicola</i>        | CGMCC 3.18364   | KY742119  | KY742273  | KY742187 | KY742361 |
| <i>Heterophoma verbasci-densiflori</i> | CBS 127.93      | GU237774  | GU238120  | MT018051 | GU237639 |
| <i>Juxtiphoma eupyrena</i>             | CBS 374.91      | FJ426999  | GU238072  | LT623268 | FJ427110 |
| <i>Juxtiphoma kolkmaniarum</i>         | CBS 146005      | MN823568  | MN823419  | MN824593 | MN824742 |
| <i>Juxtiphoma kolkmaniarum</i>         | CBS 527.66      | FJ427000  | GU238073  | LT623269 | FJ427111 |
| <i>Leptosphaerulina americana</i>      | CBS 213.55      | MH857452  | MH868995  | KT389641 | GU237539 |
| <i>Leptosphaerulina arachidicola</i>   | CBS 275.59      | MH857863  | MH869401  | MT018278 | GU237543 |
| <i>Leptosphaerulina australis</i>      | CBS 317.83      | MH861604  | MH873322  | GU371790 | GU237540 |
| <i>Leptosphaerulina australis</i>      | CBS 298.54      | MH857343  | MH868885  | MN983618 | MN983995 |
| <i>Leptosphaerulina briosiana</i>      | CBS 533.66      | EU167575  | MN943804  | MT018266 | MT005704 |

|                                              |                   |                 |                 |                 |                 |
|----------------------------------------------|-------------------|-----------------|-----------------|-----------------|-----------------|
| <i>Leptosphaerulina chartarum</i>            | CBS 329.86        | KJ796400        | MH873651        | MT018277        | -               |
| <i>Leptosphaerulina gaeumannii</i>           | CBS 311.51        | MN973601        | MN943810        | MT018274        | MT005711        |
| <i>Leptosphaerulina gaeumannii</i>           | CBS 939.69        | MH859488        | MH871269        | MT018273        | GU237541        |
| <i>Leptosphaerulina gaeumannii</i>           | LC13568           | MW090244        | MW090671        | MW092121        | MW092140        |
| <b><i>Leptosphaerulina kasensis</i></b>      | <b>YMF1.05041</b> | <b>MH257414</b> | <b>MH257499</b> | <b>OQ737921</b> | <b>OQ737925</b> |
| <i>Leptosphaerulina longiflori</i>           | MFLUCC19-0148     | MK503800        | MK503811        | MK503805        | -               |
| <i>Leptosphaerulina longiflori</i>           | FU310115          | MK503801        | MK503812        | MK503806        | -               |
| <i>Leptosphaerulina macrospora</i>           | CGMCC3.19693      | MW090232        | MW090672        | MW092122        | MW092141        |
| <i>Leptosphaerulina obtusispora</i>          | CBS 569.94        | MN973602        | MN943811        | MT018275        | MT005712        |
| <i>Leptosphaerulina saccharicola</i>         | YMF1.05076        | MH257413        | MH257498        | OQ737931        | OQ737926        |
| <i>Leptosphaerulina saccharicola</i>         | LC13561           | MW090236        | MW090664        | MW092114        | MW092133        |
| <i>Leptosphaerulina saccharicola</i>         | LC13565           | MW090237        | MW090668        | MW092118        | MW092137        |
| <b><i>Leptosphaerulina shangrilensis</i></b> | <b>YMF1.05053</b> | <b>MH257415</b> | <b>MH257500</b> | <b>MH311847</b> | <b>MH423011</b> |
| <i>Leptosphaerulina sisyrinchiiicola</i>     | CBS 121688        | MN973605        | MN943814        | MT018279        | MT005715        |
| <i>Leptosphaerulina trifolii</i>             | CBS 235.58        | MH857767        | MH869300        | MT018271        | GU237542        |
| <i>Longididymella clematidis</i>             | CBS 123705        | FJ515593        | FJ515634        | MT018076        | FJ515611        |
| <i>Longididymella vitalbae</i>               | CBS 123706        | MN973483        | MN943687        | MT018072        | MT005583        |
| <i>Longididymella vitalbae</i>               | CBS 123707        | FJ515595        | FJ515636        | MT018075        | FJ515613        |
| <i>Macroventuria angustispora</i>            | CBS 502.72        | GU237873        | GU237985        | MT018193        | GU237545        |
| <i>Macroventuria anomochaeta</i>             | CBS 525.71        | GU237881        | GU237984        | GU456346        | GU237544        |
| <i>Macroventuria terrestris</i>              | CBS 127771        | MN973550        | MN943757        | MT018194        | MT005653        |
| <i>Macroventuria wentii</i>                  | CBS 526.71        | GU237884        | GU237986        | KT389642        | GU237546        |
| <i>Microsphaeropsis fusca</i>                | CBS 116670        | MN973573        | MN943779        | MT018220        | MT005676        |
| <i>Microsphaeropsis olivacea</i>             | CBS 233.77        | GU237803        | GU237988        | MT018217        | GU237549        |
| <i>Microsphaeropsis viridis</i>              | CBS 432.71        | GU237863        | GU237987        | MT018209        | GU237548        |
| <i>Neosascochyta europaea</i>                | CBS 820.84        | KT389511        | KT389729        | KT389646        | KT389809        |

|                                         |                |          |          |          |          |
|-----------------------------------------|----------------|----------|----------|----------|----------|
| <i>Neoscochyta exitialis</i>            | CBS 812.84     | KT389517 | KT389735 | -        | KT389815 |
| <i>Neoscochyta graminicola</i>          | CBS 102789     | KT389518 | KT389736 | KT389649 | KT389816 |
| <i>Neoscochyta paspali</i>              | CBS 560.81     | FJ427048 | GU238124 | KP330426 | FJ427158 |
| <i>Neoscochyta soli</i>                 | CGMCC 3.18365  | KY742121 | KY742275 | MT018306 | KY742363 |
| <i>Neodidymelliopsis cannabis</i>       | CBS 121.75     | GU237761 | GU237972 | MT018288 | GU237535 |
| <i>Neodidymelliopsis moricola</i>       | MFLUCC 17-1063 | KY684939 | KY684941 | KY684943 | KY684937 |
| <i>Neodidymelliopsis negundinis</i>     | MFLUCC 18-0083 | MG564165 | MG564163 | MG564166 | MG564164 |
| <i>Neodidymelliopsis tiliae</i>         | CBS 519.95     | MN973610 | MN943819 | MT018287 | MT005721 |
| <i>Neomicrosphaeropsis elaeagni</i>     | MFLU 16-2389   | MH069666 | MH069672 | MH069684 | MH069691 |
| <i>Neomicrosphaeropsis italica</i>      | MFLUCC 15-0485 | KU900318 | KU729854 | KU674820 | -        |
| <i>Neomicrosphaeropsis tamaricicola</i> | MFLUCC 14-0443 | KU900322 | KU729851 | -        | -        |
| <i>Nothophoma anigozanthi</i>           | CBS 381.91     | GU237852 | GU238039 | KT389655 | GU237580 |
| <i>Nothophoma arachidis-hypogaeae</i>   | CBS 125.93     | GU237771 | GU238043 | KT389656 | GU237583 |
| <i>Nothophoma brennandiae</i>           | CBS 145912     | MN823579 | MN823430 | MN824604 | MN824753 |
| <i>Nothophoma infossa</i>               | CBS 123395     | FJ427025 | GU238089 | KT389659 | FJ427135 |
| <i>Nothophoma pruni</i>                 | MFLUCC 18-1600 | MH827007 | MH827028 | -        | -        |
| <i>Nothophoma quercina</i>              | CBS 633.92     | GU237900 | EU754127 | KT389657 | GU237609 |
| <i>Nothophoma variabilis</i>            | CBS 142457     | LT592939 | LN907428 | LT593078 | LT593008 |
| <i>Paraboeremia adianticola</i>         | CBS 187.83     | GU237796 | GU238035 | KP330401 | GU237576 |
| <i>Paraboeremia camelliae</i>           | CGMCC 3.18106  | KX829034 | KX829042 | KX829050 | KX829058 |
| <i>Paraboeremia litseae</i>             | CGMCC 3.18109  | KX829029 | KX829037 | KX829045 | KX829053 |
| <i>Paraboeremia putaminum</i>           | CBS 130.69     | GU237777 | GU238138 | MT018186 | GU237652 |
| <i>Paraboeremia putaminum</i>           | CBS 372.91     | GU237843 | GU238137 | MT018188 | GU237651 |
| <i>Paraboeremia rekkeri</i>             | CBS 144955     | MN823511 | MN823362 | MN824537 | MN824685 |
| <i>Paraboeremia selaginellae</i>        | CBS 122.93     | GU237762 | GU238142 | MT018189 | GU237656 |
| <i>Paraboeremia truini</i>              | CBS 144952     | MN823495 | MN823346 | MN824521 | MN824669 |

|                                          |                   |                 |                 |                 |                 |
|------------------------------------------|-------------------|-----------------|-----------------|-----------------|-----------------|
| <i>Paramicrosphaeropsis ellipsoidea</i>  | CBS 197.97        | MN973574        | MN943780        | MT018224        | MT005680        |
| <i>Paramicrosphaeropsis ellipsoidea</i>  | CBS 194.97        | MN973575        | MN943781        | MT018225        | MT005681        |
| <i>Phoma herbarum</i>                    | CBS 274.37        | KT389537        | KT389754        | KT389662        | KT389835        |
| <i>Phoma herbarum</i>                    | CBS 127589        | KT389539        | KT389757        | KT389664        | KT389838        |
| <i>Phoma herbarum</i>                    | CBS 615.75        | FJ427022        | EU754186        | KP330420        | FJ427133        |
| <i>Phomatodes aubrietiae</i>             | CBS 627.97        | GU237895        | GU238045        | KT389665        | GU237585        |
| <i>Phomatodes nebulosa</i>               | CBS 503.75        | GU237875        | GU238115        | MN983673        | GU237634        |
| <i>Phomatodes pilosa</i>                 | CBS 628.68        | MN973591        | MN943797        | MT018259        | MT005697        |
| <i>Pleiochaeta setosa</i>                | CBS 496.63        | EU167563        | EU167563        | MT018318        | MT005742        |
| <i>Pleiochaeta setosa</i>                | CBS 118.25        | KY929373        | KY929376        | MT018319        | MT005743        |
| <i>Pseudoascochyta novae-zelandiae</i>   | CBS 141689        | LT592892        | LT592893        | LT592895        | LT592894        |
| <i>Pseudoascochyta pratensis</i>         | CBS 141688        | LT223130        | LT223131        | LT223133        | LT223132        |
| <i>Pseudopeyronellaea eucalypti</i>      | CPC 27678         | KY979755        | KY979810        | KY979848        | KY979921        |
| <i>Pseudopeyronellaea eucalypti</i>      | CPC 27682         | KY979756        | KY979811        | KY979849        | KY979922        |
| <i>Remotididymella anthropophila</i>     | CBS 142462        | LT592936        | LN907421        | LT593075        | LT593005        |
| <i>Remotididymella anthropophila</i>     | JZB380042         | MN648210        | MN640405        | -               | MN537431        |
| <i>Remotididymella bauhinae</i>          | FMR 13770         | MK347737        | MK347954        | MK434914        | MK412884        |
| <i>Remotididymella brunnea</i>           | CBS 993.95        | MN973476        | MN943679        | MT018064        | MT005576        |
| <i>Remotididymella capsici</i>           | CBS 679.77        | MN973478        | MN943681        | MT018066        | MT005578        |
| <i>Remotididymella destructiva</i>       | CBS 378.73        | GU237849        | GU238063        | LT623258        | GU237601        |
| <b><i>Remotididymella hydrilanus</i></b> | <b>YMF1.05022</b> | <b>MH257412</b> | <b>MH257497</b> | <b>MH311846</b> | <b>OQ737932</b> |
| <i>Remotididymella humicola</i>          | CBS 120117        | MN973477        | MN943680        | MT018065        | MT005577        |
| <i>Stagonosporopsis actaeae</i>          | CBS 106.96*       | GU237734        | GU238166        | KT389672        | GU237671        |
| <i>Stagonosporopsis ailanthicola</i>     | MFLUCC 16-1439*   | KY100872        | KY100874        | KY100876        | KY100878        |
| <i>Stagonosporopsis andigena</i>         | CBS 101.80 (R)    | GU237714        | GU238169        | -               | GU237674        |
| <i>Stagonosporopsis andigena</i>         | CBS 269.80        | GU237817        | GU238170        | MT018026        | GU237675        |

|                                           |                   |                 |                 |                 |                 |
|-------------------------------------------|-------------------|-----------------|-----------------|-----------------|-----------------|
| <i>Stagonosporopsis artemisiicola</i>     | CBS 102636 (R)    | GU237728        | GU238171        | KT389674        | GU237676        |
| <i>Stagonosporopsis astragali</i>         | CBS 178.25 (R)    | GU237792        | GU238172        | MT018030        | GU237677        |
| <i>Stagonosporopsis bomiensis</i>         | CGMCC 3.18366*    | KY742123        | KY742277        | KY742189        | KY742365        |
| <b><i>Stagonosporopsis bungeiana</i></b>  | <b>YMF1.05092</b> | <b>MH257419</b> | <b>MH257504</b> | <b>MH311850</b> | <b>MH422976</b> |
| <i>Stagonosporopsis caricae</i>           | CBS 248.90        | GU237807        | GU238175        | MT018023        | GU237680        |
| <i>Stagonosporopsis caricae</i>           | CBS 282.76        | GU237821        | GU238177        | MT018022        | GU237682        |
| <i>Stagonosporopsis chrysanthemi</i>      | CBS 137.96        | GU237783        | GU238191        | MT018011        | GU237696        |
| <i>Stagonosporopsis chrysanthemi</i>      | CBS 500.63        | GU237871        | GU238190        | MT018012        | GU237695        |
| <i>Stagonosporopsis citrulli</i>          | CBS 214.65        | MN973454        | MN943656        | MT018020        | MT005553        |
| <i>Stagonosporopsis crystalliniformis</i> | CBS 713.85*       | GU237903        | GU238178        | KT389675        | GU237683        |
| <i>Stagonosporopsis cucumeris</i>         | CBS 386.65*       | MN973455        | MN943657        | MT018021        | MT005554        |
| <i>Stagonosporopsis cucurbitacearum</i>   | CBS 133.96        | GU237780        | GU238181        | KT389676        | GU237686        |
| <i>Stagonosporopsis cucurbitacearum</i>   | CBS 233.52        | MN973456        | MN943658        | MT018024        | MT005555        |
| <i>Stagonosporopsis dennisii</i>          | CBS 631.68*       | GU237899        | GU238182        | KT389677        | GU237687        |
| <i>Stagonosporopsis dorenboschii</i>      | CBS 426.90*       | GU237862        | GU238185        | KT389678        | GU237690        |
| <i>Stagonosporopsis helianthi</i>         | CBS 200.87*       | KT389545        | KT389761        | KT389683        | KT389848        |
| <i>Stagonosporopsis heliopsisidis</i>     | CBS 109182 (R)    | GU237747        | GU238186        | KT389679        | GU237691        |
| <i>Stagonosporopsis hortensis</i>         | CBS 104.42 (R)    | GU237730        | GU238198        | KT389680        | GU237703        |
| <i>Stagonosporopsis inoxydabilis</i>      | CBS 425.90*       | GU237861        | GU238188        | KT389682        | GU237693        |
| <i>Stagonosporopsis inoxydabilis</i>      | MF-9.239          | MH651539        | MH651580        | -               | MH725216        |
| <i>Stagonosporopsis lupini</i>            | CBS 101494*       | GU237724        | GU238194        | KT389685        | GU237699        |
| <b><i>Stagonosporopsis malaiana</i></b>   | <b>YMF1.05087</b> | <b>MH257421</b> | <b>MH257506</b> | <b>MH311851</b> | <b>MH423017</b> |
| <i>Stagonosporopsis oculo-hominis</i>     | CBS 634.92*       | GU237901        | GU238196        | KT389686        | GU237701        |
| <i>Stagonosporopsis papillata</i>         | CGMCC 3.18367*    | KY742125        | KY742279        | KY742191        | KY742367        |
| <i>Stagonosporopsis pini</i>              | MFLUCC 18-1549    | MK347800        | MK348019        | MK434860        | MK412886        |
| <i>Stagonosporopsis rudbeckiae</i>        | CBS 109180 (R)    | GU237745        | GU238197        | MT018015        | GU237702        |

|                                        |                 |           |          |          |          |
|----------------------------------------|-----------------|-----------|----------|----------|----------|
| <i>Stagonosporopsis sambucella</i>     | CBS 130003      | MN973459  | MN943661 | MT018029 | MT005558 |
| <i>Stagonosporopsis stuijvenbergii</i> | CBS 144953*     | MN823449  | MN823300 | MN824475 | MN824623 |
| <i>Stagonosporopsis stuijvenbergii</i> | JW 33021        | MN823450  | MN823301 | MN824476 | MN824624 |
| <i>Stagonosporopsis tanacetii</i>      | YMF1.05015      | MH257420  | MH257505 | -        | MH423016 |
| <i>Stagonosporopsis tanacetii</i>      | CBS 131484*     | NR 111724 | JQ897461 | MT018013 | JQ897496 |
| <i>Stagonosporopsis tanacetii</i>      | CBS 131485      | MN973452  | MN943654 | MT018014 | MT005551 |
| <i>Stagonosporopsis valerianellae</i>  | CBS 329.67*     | GU237832  | GU238201 | MT018034 | GU237706 |
| <i>Stagonosporopsis weymaniae</i>      | CBS 144959      | MN823453  | MN823304 | MN824479 | MN824627 |
| <i>Vacuiphoma bulgarica</i>            | CBS 357.84      | GU237837  | GU238050 | LT623256 | GU237589 |
| <i>Vacuiphoma laurina</i>              | CBS 119636      | MN973551  | MN943758 | MT018195 | MT005654 |
| <i>Vacuiphoma oculihominis</i>         | UTHSC: DI16-308 | LT592954  | LN907451 | LT593093 | LT593023 |
| <i>Vandijkomycella joseae</i>          | CBS 144948      | MN823589  | MN823440 | MN824614 | MN824763 |
| <i>Vandijkomycella joseae</i>          | CBS 143011      | MN823590  | MN823441 | MN824615 | MN824764 |
| <i>Vandijkomycella snoekiae</i>        | CBS 144954      | MN823591  | MN823442 | MN824616 | MN824765 |
| <i>Xenodidymella applanata</i>         | CBS 205.63      | GU237798  | MH869871 | KP330402 | GU237556 |
| <i>Xenodidymella applanata</i>         | CBS 195.36 T    | KT389548  | KT389764 | MT018280 | KT389852 |
| <i>Xenodidymella asphodeli</i>         | CBS 375.62      | KT389549  | MH869779 | KT389689 | MT005716 |
| <i>Xenodidymella asphodeli</i>         | CBS 499.72      | KT389550  | KT389766 | MT018282 | KT389853 |
| <i>Xenodidymella camporesii</i>        | MFLUCC 17-2309  | NR169976  | MN244168 | -        | MN871955 |
| <i>Xenodidymella catariae</i>          | CBS 102635      | GU237727  | GU237962 | KP330404 | GU237524 |
| <i>Xenodidymella glycyrrhizicola</i>   | CBS 141234      | MN973607  | KX342932 | MT018284 | MT005718 |
| <i>Xenodidymella glycyrrhizicola</i>   | CBS 684.97      | MN973606  | MN943815 | MT018283 | MT005717 |
| <i>Xenodidymella humicola</i>          | CBS 220.85      | GU237800  | GU238086 | KP330422 | GU237617 |
| <i>Xenodidymella menthae</i>           | SCUA-Ahm-W4     | OK257018  | OK257026 | OK247739 | OK247745 |
| <i>Xenodidymella menthae</i>           | SCUA-Ahm-W4-2   | OK257019  | OK257027 | OK247740 | OK247746 |
| <i>Xenodidymella weymaniae</i>         | CBS 144960      | MN823588  | MN823439 | MN824613 | MN824762 |

---

|                              |            |          |          |          |          |
|------------------------------|------------|----------|----------|----------|----------|
| <i>Coniothyrium palmarum</i> | CBS 400.71 | AY720708 | EU754153 | KT389592 | KT389792 |
|------------------------------|------------|----------|----------|----------|----------|

---
